# Supplementary material for: Amino acid hydrogen oxalate quasiracemates – sulfur containing side chains
Source: Royal Society of Chemistry journal article supplement (doi:10.1039/d1ce01214b), 2021-01-01
Supplement: d1ce01214b1.pdf [file d1ce01214b1.pdf]

Electronic supplementary information for:

## **Amino acid hydrogen oxalate quasiracemates – sulfur containing side chains**

Russell G. Wells, Katriel D. Sahlstrom, and Kraig A. Wheeler

*Department of Chemistry, Whitworth University, Spokane, WA 99251, USA. E-mail: [kraigwheeler@whitworth.edu](mailto:kraigwheeler@whitworth.edu); Tel: +1 509 777 4943*

### **Electronic Supplementary Information**

| <b>Table of Contents</b>                                       | <b>Page</b> |
|----------------------------------------------------------------|-------------|
| <b>S1</b> – Crystal Growth Experiments                         | 2           |
| <b>S2</b> - X-ray Crystallography – Single-Crystal Diffraction | 2-11        |
| <b>S3</b> – Conformational and Symmetry Assessments            | 12-14       |
| <b>S4</b> – Cambridge Crystallographic Database (CSD) Searches | 15-25       |

## S1. Crystal Growth Experiments

**General Considerations.** All chemicals and solvents were purchased from the MilliporeSigma, TCI America, or Acros Chemicals and used as received without further purification unless stated otherwise.

**Crystal Growth of Racemic Amino Acid Hydrogen Oxalates DL-Nva-HOx and DL-Met-HOx.** To a 2-dram vial was added a 1:1:2 molar ratio of the enantiomers (40 – 60 mg total) and oxalic acid dihydrate. The contents of the vial were dissolved in 2 mL of distilled water with the aid of agitation and heat (*ca.* 60 °C) and allowed to crystallize via slow evaporation at room temperature to give needle-like crystals after several days.

**Hydrogen Oxalate Quasiracemate Crystal Growth of L-Mecyst-D-Nva-2HOx, L-Met-D-Nva-2HOx, L-Etcyst-D-Nva-2HOx, L-Met-D-Leu-2HOx, L-Met-D-Nle-2HOx, L-Etcyst-D-Leu-2HOx, L-Etcyst-D-Met-2HOx, and L-Etcyst-D-Nle-2HOx.** To a 2-dram vial was added a 1:1:2 molar ratio of the quasienantiomers (40 – 60 mg total) and oxalic acid dihydrate. The contents of the vial were dissolved in 2 mL of distilled water with the aid of agitation and heat (*ca.* 60 °C) and allowed to crystallize via slow evaporation at room temperature to give needle-like crystals after several days.

**Non-Hydrogen Oxalate Quasiracemate Crystal Growth of L-Etcyst-D-Nle.** To a 2-dram vial was added equimolar amounts of L-Etcyst and D-Nle (40 – 60 mg total) and 2 mL of distilled water. The contents of the vial were agitated and heated to ~60°C until dissolution occurred and then placed in the back of a fume hood to allow for slow evaporation at room temperature to give crystals with prism morphology after several days.

**Non-Hydrogen Oxalate Quasiracemate Crystal Growth of L-Etcyst-D-Nva and L-Etcyst-D-Met.** Crystals of L-Etcyst-D-Nva and L-Etcyst-D-Met were prepared from the vapor diffusion technique by dissolving equimolar ratios of the desired quasienantiomers in a minimal amount of distilled water and using acetone as the diffusion solvent. Crystals with rod (L-Etcyst-D-Nva) and needle (L-Etcyst-D-Met) morphology suitable for crystallographic assessment were retrieved at the interface of the solvent mixture after several days.

## S2. X-ray Crystallography

Crystallographic details for each amino acid racemate and quasiracemate are summarized in Table S1. X-ray data were collected on a Bruker Venture D8 or APEX II CCD diffractometers using phi and omega scans with graphite monochromatic Cu  $K\alpha$  ( $\lambda = 1.54178 \text{ \AA}$ ) radiation. Data sets were corrected for Lorentz and polarization effects as well as absorption. The criterion for observed reflections is  $I > 2\sigma(I)$ . Lattice parameters were determined from least-squares analysis and reflection data. Empirical absorption corrections were applied using SADABS.<sup>1</sup> Structures were solved by direct methods and refined by full-matrix least-squares analysis on  $F^2$  using X-SEED<sup>2</sup> equipped with SHELXT<sup>3</sup>. All non-hydrogen atoms were refined anisotropically by full-matrix least-squares on  $F^2$  using the SHELXL<sup>4</sup> program. H atoms attached to nitrogen or oxygen were located in difference Fourier synthesis and refined isotropically with independent O/N-H distances or restrained to 0.85(2) Å. The remaining H atoms were included in idealized geometric

---

1. SADABS-2016/2 (Bruker AXS). L. Krause, R. Herbst-Irmer, G. M. Sheldrick and D. Stalke, *J. Appl. Cryst.*, 2015, **48**, 3-10.

2. L. J. Barbour, *J. Appl. Cryst.*, 2020, **53**, 1141.

3. G. M. Sheldrick, *Acta Cryst.*, 2015, **A71**, 3-8.

4. G. M. Sheldrick, *Acta Cryst.*, 2015, **C71**, 3-8.

positions with  $U_{iso}=1.2U_{eq}$  of the atom to which they were attached ( $U_{iso}=1.5U_{eq}$  for methyl groups). Molecular configurations were compared to both the known chirality of the amino acid and estimated Flack parameters<sup>5</sup> and where applicable, atomic coordinates were inverted to achieve correct structural configurations. Hydrogen bond parameters are given in Table S2.

Table S1. Crystallographic Data for Hydrogen Oxalate Amino Acids.

|                                              | DL-Nva·HOx                                     | DL-Leu·HOx <sup>6</sup>                        | DL-Nle·HOx <sup>7</sup>                        | DL-Met·HOx                                       |
|----------------------------------------------|------------------------------------------------|------------------------------------------------|------------------------------------------------|--------------------------------------------------|
| Crystal data                                 |                                                |                                                |                                                |                                                  |
| CCDC deposit no.                             | 2017249                                        | 2017256                                        | 2105696                                        | 2017258                                          |
| Empirical formula                            | C <sub>7</sub> H <sub>13</sub> NO <sub>6</sub> | C <sub>8</sub> H <sub>15</sub> NO <sub>6</sub> | C <sub>8</sub> H <sub>15</sub> NO <sub>6</sub> | C <sub>7</sub> H <sub>13</sub> NO <sub>6</sub> S |
| Crystal System,<br>space group               | Triclinic<br><i>P</i> -1                       | Monoclinic<br><i>P</i> -1                      | Triclinic<br><i>P</i> -1                       | Triclinic<br><i>P</i> -1                         |
| $M_r$                                        | 207.18                                         | 221.21                                         | 221.21                                         | 293.24                                           |
| $a$ , Å                                      | 5.7278(2)                                      | 5.6792(4)                                      | 5.6270(5)                                      | 5.5359(8)                                        |
| $b$ , Å                                      | 9.4026(3)                                      | 9.5687(7)                                      | 9.4327(9)                                      | 9.4406(14)                                       |
| $c$ , Å                                      | 9.8028(2)                                      | 9.9416(8)                                      | 10.4431(10)                                    | 10.6027(15)                                      |
| $\alpha$ , deg                               | 77.211(2)                                      | 84.722(3)                                      | 88.922(4)                                      | 90.156(6)                                        |
| $\beta$ , deg                                | 78.253(2)                                      | 74.876(3)                                      | 75.976(4)                                      | 103.956(6)                                       |
| $\gamma$ , deg                               | 78.876(2)                                      | 82.793(3)                                      | 83.757(4)                                      | 103.969(6)                                       |
| $V$ , (Å <sup>3</sup> )                      | 497.98(3)                                      | 516.43(7)                                      | 534.57(9)                                      | 520.77(13)                                       |
| $Z, Z'$                                      | 2, 1                                           | 2, 1                                           | 2, 1                                           | 2, 1                                             |
| $D_{calc}$ (g cm <sup>-3</sup> )             | 1.382                                          | 1.423                                          | 1.374                                          | 1.526                                            |
| $\mu$ (mm <sup>-1</sup> ), rad.<br>type      | 1.058                                          |                                                |                                                | 2.921                                            |
| $F_{000}$                                    | 220                                            |                                                |                                                | 252                                              |
| temp (K)                                     | 100(2)                                         |                                                |                                                | 100(2)                                           |
| Crystal form,<br>color                       | needle, colorless                              |                                                |                                                | needle, colorless                                |
| Crystal size, mm                             | 0.052x0.131x0.197                              |                                                |                                                | 0.062x0.095x0.341                                |
| Data collection                              |                                                |                                                |                                                |                                                  |
| Diffractometer                               | Bruker D8 Venture CCD                          |                                                |                                                | Bruker D8 Venture CCD                            |
| $T_{min}/T_{max}$                            | 0.6102/0.7530                                  |                                                |                                                | 0.5734, 0.7536                                   |
| No. of refls.<br>(meas., uniq.,<br>and obs.) | 5325/1802/1545                                 |                                                |                                                | 6746/2029/1957                                   |
| $R_{int}$                                    | 0.0288                                         |                                                |                                                | 0.0258                                           |
| $\vartheta_{max}$ (°)                        | 68.282                                         |                                                |                                                | 72.395                                           |
| Refinement                                   |                                                |                                                |                                                |                                                  |
| $R/R^2_{\omega}$ (obs data)                  | 0.0340/0.0825                                  |                                                |                                                | 0.0287/0.0868                                    |
| $R/R^2_{\omega}$ (all data)                  | 0.0416/0.0870                                  |                                                |                                                | 0.0295/0.0874                                    |
| $S$                                          | 1.058                                          |                                                |                                                | 1.145                                            |
| No. of refls.                                | 1802                                           |                                                |                                                | 2029                                             |
| No. of<br>parameters                         | 143                                            |                                                |                                                | 152                                              |
| $\Delta\rho_{max/min}$ (e·Å <sup>-3</sup> )  | 0.226/-0.206                                   |                                                |                                                | 0.452/-0.311                                     |
| <i>flack</i>                                 | -                                              |                                                |                                                | -                                                |

5. H. D. Flack, *Acta Crystallogr.*, 1983, **39**, 876-881.

6. K. Manoj, H. Takahashi, Y. Morita, R. G. Gonnade, S. Iwama, H. Tsue and R. Tamura, *Chirality*, 2015, **27**, 405 – 410. DL-Leu·HOx (WIPQOE).

7. R. G. Wells, K. D. Sahlstrom, F. I. Ekelem and K. A. Wheeler, *CrystEngComm*, 2021, DOI: 10.1039/D1CE01213D.

Table S1. Crystallographic Data for Hydrogen Oxalate Amino Acids. (Continued)

|                                                          | L-Mecyst-D-Nva·2HOx                                              | L-Met-D-Nva·2HOx                                                 | L-Etcyst-D-Nva·2HOx                                              | L-Met-D-Leu·2HOx                                                 |
|----------------------------------------------------------|------------------------------------------------------------------|------------------------------------------------------------------|------------------------------------------------------------------|------------------------------------------------------------------|
| Crystal data                                             |                                                                  |                                                                  |                                                                  |                                                                  |
| CCDC deposit no.                                         | 2051774                                                          | 2017257                                                          | 2017248                                                          | 2017250                                                          |
| Empirical formula                                        | C <sub>13</sub> H <sub>24</sub> N <sub>2</sub> O <sub>12</sub> S | C <sub>14</sub> H <sub>26</sub> N <sub>2</sub> O <sub>12</sub> S | C <sub>14</sub> H <sub>26</sub> N <sub>2</sub> O <sub>12</sub> S | C <sub>15</sub> H <sub>28</sub> N <sub>2</sub> O <sub>12</sub> S |
| Crystal System, space group                              | Triclinic<br><i>P</i> 1                                          | Monoclinic<br><i>P</i> 2 <sub>1</sub>                            | Triclinic<br><i>P</i> 1                                          | Triclinic<br><i>P</i> 1                                          |
| <i>M<sub>r</sub></i>                                     | 432.40                                                           | 446.43                                                           | 446.43                                                           | 460.45                                                           |
| <i>a</i> , Å                                             | 5.6975(4)                                                        | 5.6669(3)                                                        | 5.6937(3)                                                        | 5.6972(2)                                                        |
| <i>b</i> , Å                                             | 9.3292(8)                                                        | 19.0508(9)                                                       | 9.8104(5)                                                        | 9.4773(3)                                                        |
| <i>c</i> , Å                                             | 9.9228(7)                                                        | 9.7996(5)                                                        | 10.3950(5)                                                       | 10.1212(4)                                                       |
| <i>α</i> , deg                                           | 109.364(5)                                                       | 90                                                               | 66.609(2)                                                        | 90.857(2)                                                        |
| <i>β</i> , deg                                           | 102.250(4)                                                       | 101.181(1)                                                       | 87.445(2)                                                        | 104.853(2)                                                       |
| <i>γ</i> , deg                                           | 101.496(5)                                                       | 90                                                               | 78.329(2)                                                        | 97.275(2)                                                        |
| <i>V</i> , (Å <sup>3</sup> )                             | 465.00(6)                                                        | 1037.87(9)                                                       | 521.49(5)                                                        | 523.33(3)                                                        |
| <i>Z</i> , <i>Z'</i>                                     | 1, 1                                                             | 2, 1                                                             | 1, 1                                                             | 1, 1                                                             |
| <i>D<sub>calc</sub></i> (g cm <sup>-3</sup> )            | 1.544                                                            | 1.429                                                            | 1.422                                                            | 1.461                                                            |
| <i>μ</i> (mm <sup>-1</sup> ), rad. type                  | 2.182                                                            | 1.973                                                            | 1.964                                                            | 1.974                                                            |
| <i>F</i> <sub>000</sub>                                  | 228                                                              | 472                                                              | 236                                                              | 244                                                              |
| temp (K)                                                 | 100(2)                                                           | 100(2)                                                           | 100(2)                                                           | 100(2)                                                           |
| Crystal form, color                                      | needle, colorless                                                | needle, colorless                                                | needle, colorless                                                | needle, colorless                                                |
| Crystal size, mm                                         | 0.024x0.069x0.269                                                | 0.074x0.107x0.246                                                | 0.033x0.072x0.357                                                | 0.046x0.081x0.301                                                |
| Data collection                                          |                                                                  |                                                                  |                                                                  |                                                                  |
| Diffractometer                                           | Bruker D8 Venture CCD                                            |
| <i>T</i> <sub>min</sub> / <i>T</i> <sub>max</sub>        | 0.2949 / 0.5137                                                  | 0.6555/ 0.7538                                                   | 0.4116/0.7534                                                    | 0.6349/0.7536                                                    |
| No. of refls. (meas., uniq., and obs.)                   | 9527/3172/2836                                                   | 17076/4136/4079                                                  | 12781/3907/3831                                                  | 12515/3899/3624                                                  |
| <i>R</i> <sub>int</sub>                                  | 0.0739                                                           | 0.0365                                                           | 0.0343                                                           | 0.0480                                                           |
| <i>σ</i> <sub>max</sub> (°)                              | 68.466                                                           | 74.698                                                           | 72.322                                                           | 72.419                                                           |
| Refinement                                               |                                                                  |                                                                  |                                                                  |                                                                  |
| <i>R</i> / <i>R</i> <sup>2</sup> <sub>ω</sub> (obs data) | 0.0588/0.1539                                                    | 0.0320/ 0.0814                                                   | 0.0300/0.0794                                                    | 0.0341/0.0796                                                    |
| <i>R</i> / <i>R</i> <sup>2</sup> <sub>ω</sub> (all data) | 0.0660/0.1619                                                    | 0.0324/ 0.0818                                                   | 0.0305/0.0800                                                    | 0.0389/0.0841                                                    |
| <i>S</i>                                                 | 1.045                                                            | 1.073                                                            | 1.039                                                            | 1.064                                                            |
| No. of refls.                                            | 3172                                                             | 4136                                                             | 3907                                                             | 3899                                                             |
| No. of parameters                                        | 285                                                              | 295                                                              | 295                                                              | 304                                                              |
| <i>Δρ</i> <sub>max/min</sub> (e·Å <sup>-3</sup> )        | 0.675/-0.337                                                     | 0.604/-0.455                                                     | 0.417/-0.180                                                     | 0.317/-0.233                                                     |
| <i>flack</i>                                             | 0.16(2)                                                          | 0.06(2)                                                          | 0.088(19)                                                        | 0.089(11)                                                        |

Table S1. Crystallographic Data for Hydrogen Oxalate Amino Acids. (Continued)

|                                                                            | L-Met-D-Nle·2HOx                                                 | L-Etcyst·D-Leu·2HOx                                              | L-Etcyst·D-Met·2HOx                                                           | L-Etcyst·D-Nle·2HOx                                              |
|----------------------------------------------------------------------------|------------------------------------------------------------------|------------------------------------------------------------------|-------------------------------------------------------------------------------|------------------------------------------------------------------|
| Crystal data                                                               |                                                                  |                                                                  |                                                                               |                                                                  |
| CCDC deposit no.                                                           | 2017260                                                          | 2054514                                                          | 2017246                                                                       | 2051775                                                          |
| Empirical formula                                                          | C <sub>15</sub> H <sub>28</sub> N <sub>2</sub> O <sub>12</sub> S | C <sub>15</sub> H <sub>28</sub> N <sub>2</sub> O <sub>12</sub> S | C <sub>14</sub> H <sub>26</sub> N <sub>2</sub> O <sub>12</sub> S <sub>2</sub> | C <sub>15</sub> H <sub>28</sub> N <sub>2</sub> O <sub>12</sub> S |
| Crystal System,<br>space group                                             | Triclinic<br><i>P</i> 1                                          | Monoclinic<br><i>P</i> 2 <sub>1</sub>                            | Monoclinic<br><i>P</i> 2 <sub>1</sub>                                         | Monoclinic<br><i>P</i> 2 <sub>1</sub>                            |
| <i>M<sub>r</sub></i>                                                       | 460.45                                                           | 460.45                                                           | 478.49                                                                        | 460.45                                                           |
| <i>a</i> , Å                                                               | 5.6692(2)                                                        | 5.6805(3)                                                        | 5.6622(2)                                                                     | 5.6798(3)                                                        |
| <i>b</i> , Å                                                               | 9.4991(3)                                                        | 19.7087(9)                                                       | 19.4329(7)                                                                    | 19.5782(9)                                                       |
| <i>c</i> , Å                                                               | 10.2324(3)                                                       | 9.7095(4)                                                        | 9.8324(3)                                                                     | 9.7982(5)                                                        |
| $\alpha$ , deg                                                             | 93.406(2)                                                        | 90                                                               | 90                                                                            | 90                                                               |
| $\beta$ , deg                                                              | 101.269(2)                                                       | 99.848(3)                                                        | 101.810(2)                                                                    | 101.642(2)                                                       |
| $\gamma$ , deg                                                             | 97.714(2)                                                        | 90                                                               | 90                                                                            | 90                                                               |
| <i>V</i> , (Å <sup>3</sup> )                                               | 533.44(3)                                                        | 1071.01(9)                                                       | 1058.99(6)                                                                    | 1067.15(9)                                                       |
| <i>Z</i> , <i>Z'</i>                                                       | 1, 1                                                             | 2, 1                                                             | 2, 1                                                                          | 2, 1                                                             |
| <i>D<sub>calc</sub></i> (g cm <sup>-3</sup> )                              | 1.433                                                            | 1.428                                                            | 1.501                                                                         | 1.433                                                            |
| $\mu$ (mm <sup>-1</sup> ), rad.<br>type                                    | 1.937                                                            | 1.929                                                            | 2.872                                                                         | 1.936                                                            |
| <i>F</i> <sub>000</sub>                                                    | 244                                                              | 488                                                              | 504                                                                           | 488                                                              |
| temp (K)                                                                   | 100(2)                                                           | 100(2)                                                           | 100(2)                                                                        | 100(2)                                                           |
| Crystal form,<br>color                                                     | needle, colorless                                                | needle, colorless                                                | needle, colorless                                                             | needle, colorless                                                |
| Crystal size, mm                                                           | 0.290x0.240x0.180                                                | 0.061x0.07x0.28                                                  | 0.035x0.093x0.477                                                             | 0.042x0.097x0.398                                                |
| Data collection                                                            |                                                                  |                                                                  |                                                                               |                                                                  |
| Diffractometer                                                             | Bruker APEX II CCD                                               | Bruker D8 Venture CCD                                            | Bruker D8 Venture CCD                                                         | Bruker D8 Venture CCD                                            |
| <i>T</i> <sub>min</sub> / <i>T</i> <sub>max</sub>                          | 0.604/0.722                                                      | 0.6273/0.7536                                                    | 0.5527/0.7538                                                                 | 0.5999/0.7535                                                    |
| No. of refls.<br>(meas., uniq.,<br>and obs.)                               | 13001/3684/3654                                                  | 12103/3885/3599                                                  | 15724/4222/3484                                                               | 17194/4135/4021                                                  |
| <i>R</i> <sub>int</sub>                                                    | 0.0233                                                           | 0.0578                                                           | 0.0861                                                                        | 0.0490                                                           |
| $\vartheta$ <sub>max</sub> (°)                                             | 68.333                                                           | 68.303                                                           | 74.496                                                                        | 72.418                                                           |
| Refinement                                                                 |                                                                  |                                                                  |                                                                               |                                                                  |
| <i>R</i> / <i>R</i> <sup>2</sup> <sub><math>\omega</math></sub> (obs data) | 0.0241/0.0664                                                    | 0.0618/0.0618                                                    | 0.0475/0.1167                                                                 | 0.0372/0.0975                                                    |
| <i>R</i> / <i>R</i> <sup>2</sup> <sub><math>\omega</math></sub> (all data) | 0.0243/0.0666                                                    | 0.0661/0.1761                                                    | 0.0637/0.1258                                                                 | 0.0382/0.0986                                                    |
| <i>S</i>                                                                   | 1.061                                                            | 1.136                                                            | 1.041                                                                         | 1.001                                                            |
| No. of refls.                                                              | 3684                                                             | 3885                                                             | 4222                                                                          | 4135                                                             |
| No. of<br>parameters                                                       | 281                                                              | 304                                                              | 303                                                                           | 340                                                              |
| $\Delta\rho$ <sub>max/min</sub> (e·Å <sup>-3</sup> )                       | 0.258/-0.210                                                     | 1.001/-0.387                                                     | 0.439/-0.419                                                                  | 0.328/-0.221                                                     |
| <i>flack</i>                                                               | -0.004(7)                                                        | 0.100(13)                                                        | 0.053(14)                                                                     | 0.144(10)                                                        |

Table S2. Crystallographic data for Non-Hydrogen Oxalate Amino Acids.

|                                                          | L-Etcyst-D-Nva                                                  | L-Etcyst-D-Met                                                               | L-Etcyst-D-Nle                                                  |
|----------------------------------------------------------|-----------------------------------------------------------------|------------------------------------------------------------------------------|-----------------------------------------------------------------|
| Crystal data                                             |                                                                 |                                                                              |                                                                 |
| CCDC deposit no.                                         | 2051777                                                         | 2017252                                                                      | 2051776                                                         |
| Empirical formula                                        | C <sub>10</sub> H <sub>22</sub> N <sub>2</sub> O <sub>4</sub> S | C <sub>10</sub> H <sub>22</sub> N <sub>2</sub> O <sub>4</sub> S <sub>2</sub> | C <sub>11</sub> H <sub>24</sub> N <sub>2</sub> O <sub>4</sub> S |
| Crystal System,<br>space group                           | Monoclinic<br><i>P</i> 2 <sub>1</sub>                           | Monoclinic<br><i>P</i> 2 <sub>1</sub>                                        | Triclinic<br><i>P</i> 1                                         |
| <i>M<sub>r</sub></i>                                     | 266.35                                                          | 298.41                                                                       | 280.38                                                          |
| <i>a</i> , Å                                             | 9.9251(9)                                                       | 16.4457(10)                                                                  | 5.1451(4)                                                       |
| <i>b</i> , Å                                             | 4.7178(4)                                                       | 4.6941(3)                                                                    | 10.0555(7)                                                      |
| <i>c</i> , Å                                             | 14.9823(13)                                                     | 29.1646(16)                                                                  | 13.4606(10)                                                     |
| $\alpha$ , deg                                           | 90                                                              | 90                                                                           | 85.184(2)                                                       |
| $\beta$ , deg                                            | 105.286(4)                                                      | 104.877(3)                                                                   | 86.278(2)                                                       |
| $\gamma$ , deg                                           | 90                                                              | 90                                                                           | 84.585(2)                                                       |
| <i>V</i> , (Å <sup>3</sup> )                             | 676.72(10)                                                      | 2176.0(2)                                                                    | 689.71(9)                                                       |
| <i>Z</i> , <i>Z'</i>                                     | 2, 1                                                            | 6, 3                                                                         | 2, 1                                                            |
| <i>D<sub>calc</sub></i> (g cm <sup>-3</sup> )            | 1.307                                                           | 1.366                                                                        | 1.350                                                           |
| $\mu$ (mm <sup>-1</sup> ), rad.<br>type                  | 2.200                                                           | 3.423                                                                        | 2.185                                                           |
| <i>F</i> <sub>000</sub>                                  | 288                                                             | 960                                                                          | 304                                                             |
| temp (K)                                                 | 100(2)                                                          | 100(2)                                                                       | 100(2)                                                          |
| Crystal form,<br>color                                   | rod, colorless                                                  | needle, colorless                                                            | prism, colorless                                                |
| Crystal size, mm                                         | 0.066x0.185x0.329                                               | 0.042x0.345x0.424                                                            | 0.138x0.253x0.331                                               |
| Data collection                                          |                                                                 |                                                                              |                                                                 |
| Diffractometer                                           | Bruker D8 Venture CCD                                           | Bruker D8 Venture CCD                                                        | Bruker D8 Venture CCD                                           |
| <i>T</i> <sub>min</sub> / <i>T</i> <sub>max</sub>        | 0.6314/0.7500                                                   | 0.5616/0.7531                                                                | 0.6099/0.7536                                                   |
| No. of refls.<br>(meas., uniq.,<br>and obs.)             | 26867/2669/2625                                                 | 37344/7845/7334                                                              | 17337/5137/5071                                                 |
| <i>R</i> <sub>int</sub>                                  | 0.2716                                                          | 0.0667                                                                       | 0.0217                                                          |
| $\vartheta$ <sub>max</sub> (°)                           | 72.951                                                          | 68.521                                                                       | 72.307                                                          |
| Refinement                                               |                                                                 |                                                                              |                                                                 |
| <i>R</i> / <i>R</i> <sup>2</sup> <sub>ω</sub> (obs data) | 0.0485/0.1350                                                   | 0.0442/0.1158                                                                | 0.0214/0.0594                                                   |
| <i>R</i> / <i>R</i> <sup>2</sup> <sub>ω</sub> (all data) | 0.0489/0.1356                                                   | 0.0477/0.1188                                                                | 0.0217/0.0597                                                   |
| <i>S</i>                                                 | 1.061                                                           | 1.065                                                                        | 1.048                                                           |
| No. of refls.                                            | 2669                                                            | 7845                                                                         | 5137                                                            |
| No. of<br>parameters                                     | 174                                                             | 565                                                                          | 365                                                             |
| $\Delta\rho$ <sub>max/min</sub> (e·Å <sup>-3</sup> )     | 0.565/-0.570                                                    | 0.496/-0.347                                                                 | 0.277/-0.190                                                    |
| <i>flack</i>                                             | 0.004(16)                                                       | 0.093(7)                                                                     | 0.080(3)                                                        |

Table S3. Hydrogen Bond Parameters for Racemic and Quasiracemic Amino Acids.

| Compound   | D-H...A                    | D-H (Å) | H...A (Å) | D...A (Å)  | D-H...A (°) |
|------------|----------------------------|---------|-----------|------------|-------------|
| DL-Nva·HOx | O1-H1...O6 <sup>v</sup>    | 0.88(2) | 1.73(2)   | 2.5771(14) | 161.6(19)   |
|            | O3-H3...O5 <sup>i</sup>    | 0.89(2) | 1.75(2)   | 2.6348(14) | 173.8(18)   |
|            | N1-H1A...O6 <sup>ii</sup>  | 0.92(2) | 1.95(2)   | 2.8529(17) | 166.4(16)   |
|            | N1-H1B...O2 <sup>iii</sup> | 0.93(2) | 1.94(2)   | 2.8408(16) | 161.9(17)   |
|            | N1-H1C...O5 <sup>iv</sup>  | 0.92(2) | 1.94(2)   | 2.8082(16) | 157.7(17)   |

Symmetry codes: (i)  $x-1, y, z$ ; (ii)  $1-x, 2-y, 1-z$ ; (iii)  $-x, 2-y, 1-z$ ; (iv)  $x-1, y, 1+z$ ; (v)  $x, y, z$

| Compound   | D-H...A                    | D-H (Å) | H...A (Å) | D...A (Å)  | D-H...A (°) |
|------------|----------------------------|---------|-----------|------------|-------------|
| DL-Leu·HOx | O1-H1...O6 <sup>iv</sup>   | 0.87(2) | 1.72(2)   | 2.5736(10) | 166.7(15)   |
|            | O3-H3...O5 <sup>v</sup>    | 0.91(2) | 1.69(2)   | 2.5920(10) | 174.9(14)   |
|            | N1-H1A...O6 <sup>ii</sup>  | 0.92(2) | 1.93(2)   | 2.8278(12) | 165.6(13)   |
|            | N1-H1B...O2 <sup>iii</sup> | 0.90(2) | 1.99(2)   | 2.8542(12) | 162.3(13)   |
|            | N1-H1C...O5 <sup>i</sup>   | 0.91(2) | 2.00(2)   | 2.8509(11) | 155.0(13)   |

Symmetry codes: (i)  $x, y-1, z$ ; (ii)  $-x+1.5, y+0.5, -z+1.5$ ; (iii)  $1-x, -y, 1-z$ ; (iv)  $x-0.5, -y-3.5, z-0.5$ ; (v)  $x, y, z$

| Compound   | D-H...A                    | D-H (Å) | H...A (Å) | D...A (Å)  | D-H...A (°) |
|------------|----------------------------|---------|-----------|------------|-------------|
| DL-Met·HOx | O1-H1...O6 <sup>i</sup>    | 0.87(2) | 1.76(2)   | 2.6175(14) | 171.7(19)   |
|            | O3-H3...O5 <sup>ii</sup>   | 0.97(2) | 1.52(2)   | 2.4837(13) | 175.1(18)   |
|            | N1-H1A...O2 <sup>ii</sup>  | 0.90(2) | 2.07(2)   | 2.8790(15) | 149.0(16)   |
|            | N1-H1B...O6 <sup>iii</sup> | 0.86(2) | 2.12(2)   | 2.8796(15) | 146.5(17)   |
|            | N1-H1C...O4 <sup>iv</sup>  | 0.90(2) | 1.98(2)   | 2.8435(15) | 161.8(17)   |

Symmetry codes: (i)  $1-x, 1+y, z$ ; (ii)  $x-1, y, z$ ; (iii)  $-x, -y, -z$ ; (iv)  $x, y, z$

| Compound         | D-H...A                     | D-H (Å) | H...A (Å) | D...A (Å) | D-H...A (°) |
|------------------|-----------------------------|---------|-----------|-----------|-------------|
| L-Met·D-Nva·2HOx | O1-H1...O8 <sup>i</sup>     | 0.96(4) | 1.63(4)   | 2.571(2)  | 166(4)      |
|                  | O3-H3...O12 <sup>ii</sup>   | 0.88(4) | 1.72(4)   | 2.557(2)  | 158(4)      |
|                  | O5-H5...O7 <sup>iii</sup>   | 0.88(4) | 1.73(4)   | 2.607(2)  | 174(4)      |
|                  | O9-H9...O11 <sup>iv</sup>   | 0.74(4) | 1.86(4)   | 2.602(2)  | 177(4)      |
|                  | N1-H1B...O12 <sup>v</sup>   | 0.87(4) | 2.00(4)   | 2.859(3)  | 166(3)      |
|                  | N1-H1A...O4 <sup>vii</sup>  | 0.86(4) | 2.00(4)   | 2.813(3)  | 156(3)      |
|                  | N1-H1C...O7 <sup>vii</sup>  | 0.82(4) | 2.03(4)   | 2.811(3)  | 159(3)      |
|                  | N2-H2A...O2 <sup>vii</sup>  | 0.89(4) | 2.02(4)   | 2.835(3)  | 151(3)      |
|                  | N2-H2B...O8 <sup>vi</sup>   | 0.89(4) | 1.98(4)   | 2.833(3)  | 160(3)      |
|                  | N2-H2C...O11 <sup>vii</sup> | 0.85(4) | 2.00(4)   | 2.802(3)  | 156(3)      |

Symmetry codes: (i)  $1+x, y, 1+z$ ; (ii)  $x-1, y, z-1$ ; (iii)  $x-1, y, z$ ; (iv)  $1+x, y, z$ ; (v)  $x, y, z-1$ ; (vi)  $x, y, 1+z$ ; (vii)  $x, y, z$

| Compound            | D–H...A                    | D–H (Å) | H...A (Å) | D...A (Å) | D–H...A (°) |
|---------------------|----------------------------|---------|-----------|-----------|-------------|
| L-Mecyst-D-Nva-2HOx | O1–H1...O8 <sup>i</sup>    | 0.85(3) | 1.76(4)   | 2.569(6)  | 158(9)      |
|                     | O3–H3...O12 <sup>ii</sup>  | 0.86(3) | 1.76(4)   | 2.578(6)  | 160(10)     |
|                     | O5–H5...O7 <sup>iii</sup>  | 0.85(3) | 1.79(3)   | 2.632(5)  | 179(9)      |
|                     | O9–H9...O11 <sup>iv</sup>  | 0.86(3) | 1.78(3)   | 2.628(6)  | 169(10)     |
|                     | N1–H1A...O7 <sup>v</sup>   | 0.85(3) | 2.00(4)   | 2.827(7)  | 166(8)      |
|                     | N1–H1B...O12 <sup>ii</sup> | 0.86(3) | 2.02(4)   | 2.847(7)  | 162(9)      |
|                     | N1–H1C...O4 <sup>iii</sup> | 0.86(3) | 2.05(5)   | 2.859(7)  | 156(9)      |
|                     | N2–H2A...O11 <sup>v</sup>  | 0.85(3) | 2.09(5)   | 2.824(7)  | 144(7)      |
|                     | N2–H2B...O8 <sup>i</sup>   | 0.86(3) | 2.00(4)   | 2.813(7)  | 158(8)      |
|                     | N2–H2C...O2 <sup>iv</sup>  | 0.85(3) | 2.06(5)   | 2.859(7)  | 156(9)      |

Symmetry codes: (i)  $x-1, y, z-1$ ; (ii)  $1+x, y, 1+z$ ; (iii)  $1+x, y, z$ ; (iv)  $x-1, y, z$ ; (v)  $x, y, z$

| Compound            | D–H...A                     | D–H (Å) | H...A (Å) | D...A (Å) | D–H...A (°) |
|---------------------|-----------------------------|---------|-----------|-----------|-------------|
| L-Etcyst-D-Nva-2HOx | O1–H1...O8 <sup>v</sup>     | 0.74(4) | 1.83(4)   | 2.554(2)  | 167(4)      |
|                     | O3–H3...O12 <sup>vi</sup>   | 0.93(4) | 1.71(4)   | 2.592(2)  | 158(4)      |
|                     | O5–H5...O7 <sup>iii</sup>   | 0.79(4) | 1.84(4)   | 2.631(2)  | 174(4)      |
|                     | O9–H9...O11 <sup>iv</sup>   | 0.80(4) | 1.81(4)   | 2.610(2)  | 174(4)      |
|                     | N1–H1C...O4 <sup>vii</sup>  | 0.90(4) | 1.99(4)   | 2.847(3)  | 159(3)      |
|                     | N1–H1B...O7 <sup>vii</sup>  | 0.77(4) | 2.11(4)   | 2.829(3)  | 155(4)      |
|                     | N1–H1A...O12 <sup>ii</sup>  | 0.82(4) | 2.08(4)   | 2.858(3)  | 159(4)      |
|                     | N2–H2A...O8 <sup>i</sup>    | 0.93(4) | 1.91(4)   | 2.827(3)  | 167(3)      |
|                     | N2–H2B...O11 <sup>vii</sup> | 0.85(4) | 2.00(4)   | 2.799(3)  | 156(3)      |
|                     | N2–H2C...O2 <sup>vii</sup>  | 0.82(4) | 2.05(4)   | 2.827(3)  | 159(3)      |

Symmetry codes: (i)  $x, 1+y, z$ ; (ii)  $x, y-1, z$ ; (iii)  $1+x, y, z$ ; (iv)  $x-1, y, z$ ; (v)  $x-1, 1+y, z$ ; (vi)  $1+x, y-1, z$ ; (vii)  $x, y, z$

| Compound         | D–H...A                     | D–H (Å) | H...A (Å) | D...A (Å) | D–H...A (°) |
|------------------|-----------------------------|---------|-----------|-----------|-------------|
| L-Met-D-Leu-2HOx | O1–H1...O8 <sup>i</sup>     | 0.85(3) | 1.74(3)   | 2.568(4)  | 166(5)      |
|                  | O3–H3...O12 <sup>ii</sup>   | 0.85(3) | 1.72(3)   | 2.568(4)  | 172(5)      |
|                  | O5–H5...O7 <sup>iii</sup>   | 0.85(3) | 1.77(3)   | 2.618(3)  | 173(5)      |
|                  | O9–H9...O11 <sup>iv</sup>   | 0.83(3) | 1.80(3)   | 2.624(3)  | 170(5)      |
|                  | N1–H1A...O7 <sup>vii</sup>  | 0.86(3) | 1.95(3)   | 2.790(4)  | 166(5)      |
|                  | N1–H1B...O12 <sup>v</sup>   | 0.87(3) | 2.03(3)   | 2.899(4)  | 174(5)      |
|                  | N1–H1C...O4 <sup>vii</sup>  | 0.88(3) | 1.98(3)   | 2.797(4)  | 154(5)      |
|                  | N2–H2B...O8 <sup>vi</sup>   | 0.88(3) | 1.95(3)   | 2.776(4)  | 156(4)      |
|                  | N2–H2A...O11 <sup>vii</sup> | 0.87(7) | 2.02(7)   | 2.878(5)  | 171(4)      |
|                  | N2–H2C...O2 <sup>vii</sup>  | 0.86(3) | 1.99(3)   | 2.795(4)  | 155(5)      |

Symmetry codes: (i)  $1+x, 1+y, z$ ; (ii)  $x-1, y-1, z$ ; (iii)  $x-1, y, z$ ; (iv)  $1+x, y, z$ ; (v)  $x, y-1, z$ ; (vi)  $x, 1+y, z$ ; (vii)  $x, y, z$



| Compound            | D–H...A                     | D–H (Å) | H...A (Å) | D...A (Å)  | D–H...A (°) |
|---------------------|-----------------------------|---------|-----------|------------|-------------|
| L-Etcyst·D-Leu·2HOx | O1–H1...O8 <sup>i</sup>     | 0.83(2) | 1.75(2)   | 2.572(2)   | 169(3)      |
|                     | O3–H3...O12 <sup>ii</sup>   | 0.86(2) | 1.73(2)   | 2.567(2)   | 163(3)      |
|                     | O5–H5...O7 <sup>iii</sup>   | 0.81(2) | 1.79(2)   | 2.6009(19) | 176(3)      |
|                     | O9–H9...O11 <sup>iv</sup>   | 0.85(2) | 1.75(2)   | 2.5972(19) | 176(3)      |
|                     | N1–H1A...O7 <sup>vii</sup>  | 0.88(2) | 1.94(2)   | 2.781(2)   | 160(3)      |
|                     | N1–H1B...O4 <sup>v</sup>    | 0.87(2) | 1.98(2)   | 2.791(2)   | 154(3)      |
|                     | N1–H1C...O12 <sup>vii</sup> | 0.88(2) | 2.01(2)   | 2.883(2)   | 173(3)      |
|                     | N2–H2A...O8 <sup>vi</sup>   | 0.84(2) | 2.03(2)   | 2.867(2)   | 175(3)      |
|                     | N2–H2B...O2 <sup>vii</sup>  | 0.85(2) | 2.01(2)   | 2.803(2)   | 154(3)      |
|                     | N2–H2C...O11 <sup>vii</sup> | 0.88(2) | 1.92(2)   | 2.774(2)   | 162(3)      |

Symmetry codes: (i) 1+x, 1+y, z; (ii) x-1, y-1, z; (iii) x-1, y, z; (iv) 1+x, y, z; (v) x, y-1, z; (vi) x, 1+y, z; (vii) x, y, z

| Compound         | D–H...A                     | D–H (Å) | H...A (Å) | D...A (Å)  | D–H...A (°) |
|------------------|-----------------------------|---------|-----------|------------|-------------|
| L-Met·D-Nle·2HOx | O1–H1...O8 <sup>i</sup>     | 0.83(2) | 1.75(2)   | 2.572(2)   | 169(3)      |
|                  | O3–H3...O12 <sup>ii</sup>   | 0.86(2) | 1.73(2)   | 2.567(2)   | 163(3)      |
|                  | O5–H5...O7 <sup>iii</sup>   | 0.81(2) | 1.79(2)   | 2.6009(19) | 176(3)      |
|                  | O9–H9...O11 <sup>iv</sup>   | 0.85(2) | 1.75(2)   | 2.5972(19) | 176(3)      |
|                  | N1–H1A...O7 <sup>vii</sup>  | 0.88(2) | 1.94(2)   | 2.781(2)   | 160(3)      |
|                  | N1–H1B...O4 <sup>vii</sup>  | 0.87(2) | 1.98(2)   | 2.791(2)   | 154(3)      |
|                  | N1–H1C...O12 <sup>v</sup>   | 0.88(2) | 2.01(2)   | 2.883(2)   | 173(3)      |
|                  | N2–H2A...O8 <sup>vi</sup>   | 0.84(2) | 2.03(2)   | 2.867(2)   | 175(3)      |
|                  | N2–H2B...O2 <sup>vii</sup>  | 0.85(2) | 2.01(2)   | 2.803(2)   | 154(3)      |
|                  | N2–H2C...O11 <sup>vii</sup> | 0.88(2) | 1.92(2)   | 2.774(2)   | 162(3)      |

Symmetry codes: (i) 1+x, 1+y, z; (ii) x-1, y-1, z; (iii) x-1, y, z; (iv) 1+x, y, z; (v) x, y-1, z; (vi) x, 1+y, z; (vii) x, y, z

| Compound            | D–H...A                     | D–H (Å) | H...A (Å) | D...A (Å) | D–H...A (°) |
|---------------------|-----------------------------|---------|-----------|-----------|-------------|
| L-Etcyst·D-Nle·2HOx | O1–H1...O8 <sup>i</sup>     | 0.86(3) | 1.75(3)   | 2.576(12) | 159(5)      |
|                     | O3–H3...O12 <sup>ii</sup>   | 0.85(3) | 1.79(3)   | 2.617(11) | 166(5)      |
|                     | O5–H5...O7 <sup>iii</sup>   | 0.85(3) | 1.78(3)   | 2.617(12) | 169(5)      |
|                     | O9–H9...O11 <sup>iv</sup>   | 0.86(3) | 1.76(3)   | 2.619(12) | 176(5)      |
|                     | N1–H1C...O7 <sup>vii</sup>  | 0.83(3) | 2.04(3)   | 2.856(12) | 165(4)      |
|                     | N1–H1A...O12 <sup>v</sup>   | 0.84(3) | 1.99(3)   | 2.782(14) | 157(5)      |
|                     | N1–H1B...O4 <sup>vii</sup>  | 0.85(3) | 2.06(3)   | 2.836(4)  | 153(4)      |
|                     | N2–H2A...O8 <sup>vi</sup>   | 0.87(3) | 1.92(3)   | 2.773(14) | 166(4)      |
|                     | N2–H2B...O11 <sup>vii</sup> | 0.85(3) | 2.05(3)   | 2.838(11) | 154(4)      |
|                     | N2–H2C...O2 <sup>vii</sup>  | 0.86(3) | 2.00(3)   | 2.825(4)  | 162(4)      |

Symmetry codes: (i) x-1, y, z-1; (ii) 1+x, y, 1+z; (iii) 1+x, y, z; (iv) x-1, y, z; (v) x, y, 1+z; (vi) x, y, z-1; (vii) x, y, z

| Compound                    | D–H...A                    | D–H (Å) | H...A (Å) | D...A (Å) | D–H...A (°) |
|-----------------------------|----------------------------|---------|-----------|-----------|-------------|
| L-Etcyst·D-Met·2HOx         | O1–H1...O8 <sup>i</sup>    | 0.86(3) | 1.76(4)   | 2.586(5)  | 160(7)      |
|                             | O3–H3...O12 <sup>ii</sup>  | 0.86(3) | 1.75(4)   | 2.550(5)  | 154(7)      |
|                             | O5–H5...O7 <sup>iii</sup>  | 0.84(3) | 1.77(3)   | 2.601(5)  | 171(7)      |
|                             | O9–H9...O11 <sup>iv</sup>  | 0.84(3) | 1.76(3)   | 2.599(5)  | 172(7)      |
|                             | N1–H1A...O7 <sup>vii</sup> | 0.94(7) | 1.98(7)   | 2.825(6)  | 148(6)      |
|                             | N1–H1B...O12 <sup>v</sup>  | 0.93(7) | 1.93(7)   | 2.860(6)  | 176(6)      |
|                             | N1–H1C...O4 <sup>vii</sup> | 0.96(7) | 1.92(7)   | 2.831(6)  | 157(6)      |
|                             | N2–H2B...O8 <sup>vi</sup>  | 0.73(7) | 2.18(7)   | 2.873(6)  | 159(7)      |
|                             | N2–H2C...O2 <sup>vii</sup> | 0.76(7) | 2.14(7)   | 2.849(6)  | 156(7)      |
| N2–H2A...O11 <sup>vii</sup> | 0.97(7)                    | 1.83(7) | 2.783(6)  | 166(6)    |             |

Symmetry codes: (i)  $x-1, y, z-1$ ; (ii)  $1+x, y, 1+z$ ; (iii)  $1+x, y, z$ ; (iv)  $x-1, y, z$ ; (v)  $x, y, 1+z$ ; (vi)  $x, y, z-1$ ; (vii)  $x, y, z$

| Compound | D–H...A                    | D–H (Å) | H...A (Å) | D...A (Å)  | D–H...A (°) |
|----------|----------------------------|---------|-----------|------------|-------------|
| (DL)-Met | N1–H1C...O2 <sup>i</sup>   | 0.92(2) | 1.90(2)   | 2.8073(18) | 169(2)      |
|          | N1–H1A...O2 <sup>ii</sup>  | 0.98(2) | 1.83(2)   | 2.7847(18) | 166.4(19)   |
|          | N1–H1B...O1 <sup>iii</sup> | 0.93(2) | 1.85(2)   | 2.7753(17) | 173(2)      |

Symmetry codes: (i)  $x, 1-y, 1/2+z$ ; (ii)  $x, 2-y, 1/2+z$ ; (iii)  $3/2-x, 1/2+y, 1/2-z$

| Compound      | D–H...A                       | D–H (Å) | H...A (Å) | D...A (Å) | D–H...A (°) |
|---------------|-------------------------------|---------|-----------|-----------|-------------|
| L-EtCys·D-Met | N1A–H11A...O4B <sup>vii</sup> | 0.78(7) | 2.04(8)   | 2.802(5)  | 167(7)      |
|               | N1C–H12C...O3C <sup>i</sup>   | 0.88(3) | 1.95(3)   | 2.811(4)  | 168(4)      |
|               | N1C–H11C...O3C <sup>ii</sup>  | 0.89(7) | 1.92(7)   | 2.800(4)  | 167(6)      |
|               | N1C–H13C...O2C <sup>ii</sup>  | 0.84(5) | 1.92(5)   | 2.751(4)  | 171(4)      |
|               | N1A–H12A...O4B <sup>iii</sup> | 0.85(6) | 1.95(6)   | 2.802(5)  | 173(4)      |
|               | N1B–H13B...O3A <sup>vii</sup> | 0.83(6) | 2.00(6)   | 2.822(5)  | 170(5)      |
|               | N1A–H13B...O1B <sup>vii</sup> | 0.91(5) | 1.87(5)   | 2.776(4)  | 173(5)      |
|               | N1B–H11B...O2A <sup>iv</sup>  | 0.91(5) | 1.84(5)   | 2.741(4)  | 168(5)      |
|               | N2B–H16B...O1C <sup>iv</sup>  | 0.92(6) | 1.84(6)   | 2.753(4)  | 171(5)      |
|               | N2B–H14B...O4C <sup>vii</sup> | 0.79(6) | 1.99(6)   | 2.774(4)  | 171(6)      |
|               | N2A–H14A...O4A <sup>v</sup>   | 0.84(5) | 1.94(5)   | 2.785(4)  | 177(4)      |
|               | N2C–H16C...O2B <sup>iii</sup> | 0.84(6) | 1.98(6)   | 2.810(5)  | 168(4)      |
|               | N2A–H15A...O1A <sup>vi</sup>  | 0.88(6) | 1.89(6)   | 2.764(4)  | 174(5)      |
|               | N2C–H15C...O2B <sup>vii</sup> | 0.94(5) | 1.92(5)   | 2.853(5)  | 171(4)      |
|               | N2B–H15B...O1C <sup>vii</sup> | 0.91(6) | 1.91(6)   | 2.762(4)  | 156(5)      |
|               | N1B–H12B...O3A <sup>iv</sup>  | 0.80(6) | 2.05(6)   | 2.812(5)  | 158(5)      |
|               | N2A–H16A...O1A <sup>v</sup>   | 0.92(5) | 1.88(5)   | 2.750(4)  | 157(4)      |
|               | N2C–H14C...O3B <sup>iii</sup> | 0.88(5) | 1.96(5)   | 2.831(4)  | 166(4)      |

Symmetry codes: (i)  $2-x, -1-y, 1-z$ ; (ii)  $2-x, y, 1-z$ ; (iii)  $x, y-1, z$ ; (iv)  $x, y+1, z$ ; (v)  $1-x, -1-y, -z$ ; (vi)  $1-x, -y, -z$ ; (vii)  $x, y, z$

| Compound      | D–H…A                      | D–H (Å) | H…A (Å) | D…A (Å)    | D–H…A (°) |
|---------------|----------------------------|---------|---------|------------|-----------|
| L-EtCys·D-Nle | N1A–H1A…O1B <sup>v</sup>   | 0.92(2) | 1.86(3) | 2.7620(17) | 167(2)    |
|               | N1A–H2A…O3A <sup>v</sup>   | 0.89(2) | 2.32(2) | 2.9464(17) | 127.7(19) |
|               | N1A–H2A…O4A <sup>i</sup>   | 0.89(2) | 2.25(2) | 3.0146(18) | 144(2)    |
|               | N1A–H3A…O2A <sup>ii</sup>  | 0.90(2) | 1.98(2) | 2.8339(18) | 158.6(19) |
|               | N1B–H4A…O4A <sup>iii</sup> | 0.93(2) | 1.84(3) | 2.7599(17) | 168(2)    |
|               | N1B–H5A…O2B <sup>ii</sup>  | 0.90(2) | 1.99(2) | 2.8536(18) | 159(2)    |
|               | N1B–H6A…O3B <sup>v</sup>   | 0.88(2) | 2.36(2) | 3.0007(17) | 130.6(19) |
|               | N1B–H6A…O4B <sup>i</sup>   | 0.88(2) | 2.24(2) | 2.9857(18) | 143(2)    |
|               | N2A–H7B…O3B <sup>iv</sup>  | 0.87(3) | 1.90(3) | 2.7605(18) | 173(2)    |
|               | N2A–H9B…O4A <sup>i</sup>   | 0.87(2) | 1.94(2) | 2.8125(18) | 172(2)    |
|               | N2A–H8B…O1A <sup>v</sup>   | 0.89(3) | 2.42(2) | 2.9116(17) | 115.0(18) |
|               | N2A–H8B…O2A <sup>ii</sup>  | 0.89(3) | 2.08(3) | 2.9241(19) | 157(2)    |
|               | N2B–H2…O3A <sup>v</sup>    | 0.88(3) | 1.88(3) | 2.7542(18) | 172(2)    |
|               | N2B–H3…O1B <sup>v</sup>    | 0.91(2) | 2.37(2) | 2.9420(17) | 120.7(18) |
|               | N2B–H3…O2B <sup>ii</sup>   | 0.91(2) | 2.11(3) | 2.9345(19) | 151(2)    |
|               | N2B–H12B…O4B <sup>i</sup>  | 0.87(2) | 1.98(2) | 2.8265(18) | 166(2)    |

Symmetry codes: (i)  $x-1, y, z$ ; (ii)  $x+1, y, z$ ; (iii)  $x+1, y-1, z$ ; (iv)  $x-1, y+1, z$ ; (v)  $x, y, z$

### S3. Conformational and Symmetry Assessments

**Conformational Assessments ( $\chi_{\text{RMS}}$ ).** Each quasiracemic hydrogen oxalate amino acid structure was processed using X-SEED<sup>2</sup> where each amino acid component was isolated, configuration inverted to L if necessary, and saved as an individual file. These structure files were then loaded into CCDC-Mercury<sup>8</sup> and processed using the structure overlay feature. Hydrogen atoms were omitted from the assessments. The initial overlay process involved matching common atoms from the core N-C(C)-CO<sub>2</sub> fragments to determine the root-mean-squared best fit value ( $\chi_{\text{RMS}}$ ). Additional overlay calculations were performed on the two molecules by including the core fragments and the next atom associated with the side chain *R* group. These sequential assessments provided a range of  $\chi_{\text{RMS}}$  values that shows the dependency of molecular conformations to chain length.

**Inversion Symmetry Assessments ( $C_i$ ).** The quasiracemic crystal structures were initially processed using X-SEED<sup>2</sup>. The hydrogen oxalate fragments, hydrogen atoms, and non-hydrogen atoms lacking an equivalent partner were omitted. Each quasienantiomeric pair was organized with the same packing motifs – *i.e.*,  $R_2^2(10)$  patterns – to provide consistent processing of the structures. A series of structure files were then generated that differed by the length of the *R* groups. These files containing near inversion related quasiracemate fragments and were assessed using Avnir's *Continuous Symmetry Measures* online tools.<sup>9</sup> The output from this process gave a quantitative measure ( $C_i$  values) of the degree of inversion symmetry for each structural fragment as a function of side chain length.

Table S4. Symmetry ( $C_i$  values) and Conformation ( $\chi_{\text{RMS}}$  values) Data for the Quasiracemates

| Compound            | Molecular section | $\chi_{\text{RMS}}$ |                     | $C_i$               |                     |
|---------------------|-------------------|---------------------|---------------------|---------------------|---------------------|
|                     |                   | L-Mecyst·D-Nva·2HOx | L-Mecyst·D-Nva·2HOx | L-Mecyst·D-Nva·2HOx | L-Mecyst·D-Nva·2HOx |
| L-Mecyst·D-Nva·2HOx | 1                 | 0.0194              |                     | 0.0065              |                     |
|                     | 2                 | 0.0769              |                     | 0.0312              |                     |
|                     | 3                 | 0.116               |                     | 0.0513              |                     |

  

| Compound            | Molecular section | $\chi_{\text{RMS}}$ |                     | $C_i$               |                     |
|---------------------|-------------------|---------------------|---------------------|---------------------|---------------------|
|                     |                   | L-Etcyst·D-Nva·2HOx | L-Etcyst·D-Nva·2HOx | L-Etcyst·D-Nva·2HOx | L-Etcyst·D-Nva·2HOx |
| L-Etcyst·D-Nva·2HOx | 1                 | 0.035               |                     | 0.0453              |                     |
|                     | 2                 | 0.118               |                     | 0.830               |                     |
|                     | 3                 | 0.610               |                     | 1.3336              |                     |

8. C. F. Macrae, I. Sovago, S. J. Cottrell, P. T. A. Galek, P. McCabe, E. Pidcock, M. Platings, G. P. Shields, J. S. Stevens, M. Towler and P. A. Wood, *J. Appl. Cryst.*, 2020, **53**, 226 – 235.

9. P. Alemany, D. Casanova, S. Alvarez, C. Dryzun and David Avnir, "Continuous Symmetry Measures: A New Tool in Quantum Chemistry" *Reviews in Computational Chemistry*, Volume 30, Abby L. Parrill and Kenneth B. Lipkowitz, Editors, Chapter 7, p. 289 – 352, Wiley, 2017. M. Pinsky, C. Dryzun, D. Casanova, P. Alemany and D. Avnir, *J. Comput. Chem.*, 2008, **29**, 2712 – 2721. H. Zabrodsky, S. Peleg and D. Avnir, *J. Am. Chem. Soc.*, 1992, **114**, 7843 – 7851.

| Compound            | Molecular section | $\chi_{RMS}$        | $C_i$               |
|---------------------|-------------------|---------------------|---------------------|
|                     |                   | L-Etcyst·D-Leu·2HOx | L-Etcyst·D-Leu·2HOx |
| L-Etcyst·D-Leu·2HOx | 1                 | 0.189               | 0.4585              |
|                     | 2                 | 0.609               | 1.1924              |
|                     | 3                 | 0.881               | 2.5009              |

| Compound            | Molecular section | $\chi_{RMS}$        | $C_i$               |
|---------------------|-------------------|---------------------|---------------------|
|                     |                   | L-Etcyst·D-Nle·2HOx | L-Etcyst·D-Nle·2HOx |
| L-Etcyst·D-Nle·2HOx | 1                 | 0.058               | 0.0322              |
|                     | 2                 | 0.099               | 0.475               |
|                     | 3                 | 0.578               | 1.3527              |
|                     | 4                 | 0.886               | 3.6913              |

| Compound         | Molecular section | $\chi_{RMS}$     | $\chi_{RMS}$ | $C_i$            | $C_i$  |
|------------------|-------------------|------------------|--------------|------------------|--------|
|                  |                   | L-Met·D-Nva·2HOx | URODIP       | L-Met·D-Nva·2HOx | URODIP |
| L-Met·D-Nva·2HOx | 1                 | 0.063            | 0.0144       | 0.0848           | 0.0007 |
|                  | 2                 | 0.629            | 0.0282       | 1.2585           | 0.0031 |
|                  | 3                 | 0.904            | 0.0946       | 2.6933           | 0.0186 |

| Compound         | Molecular section | $\chi_{RMS}$     | $\chi_{RMS}$ | $C_i$            | $C_i$  |
|------------------|-------------------|------------------|--------------|------------------|--------|
|                  |                   | L-Met·D-Leu·2HOx | BERNIV       | L-Met·D-Leu·2HOx | BERNIV |
| L-Met·D-Leu·2HOx | 1                 | 0.031            | 0.109        | 0.0074           | 0.1432 |
|                  | 2                 | 0.074            | 0.168        | 0.0493           | 0.4149 |
|                  | 3                 | 0.136            | 0.251        | 0.1404           | 0.7938 |

| Compound         | Molecular section | $\chi_{RMS}$     | $\chi_{RMS}$ | $C_i$            | $C_i$  |
|------------------|-------------------|------------------|--------------|------------------|--------|
|                  |                   | L-Met·D-Nle·2HOx | GOLVOS       | L-Met·D-Nle·2HOx | GOLVOS |
| L-Met·D-Nle·2HOx | 1                 | 0.027            | 0.0082       | 0.0236           | 0.0009 |
|                  | 2                 | 0.059            | 0.00918      | 0.0355           | 0.0009 |
|                  | 3                 | 0.623            | 0.0861       | 1.2465           | 0.0157 |
|                  | 4                 | 0.987            | 0.124        | 3.578            | 0.0172 |

| Compound       | Molecular section | $\chi_{\text{RMS}}$<br>L-Etcyst·D-Nva | $C_i$<br>L-Etcyst·D-Nva |
|----------------|-------------------|---------------------------------------|-------------------------|
| L-Etcyst·D-Nva | 1                 | 0.0531                                | 0.1993                  |
|                | 2                 | 0.166                                 | 0.3818                  |
|                | 3                 | 0.595                                 | 0.4329                  |

| Compound                          | Molecular section | $\chi_{\text{RMS}}$<br>L-Etcyst·D-Nle | $C_i$<br>L-Etcyst·Nle |
|-----------------------------------|-------------------|---------------------------------------|-----------------------|
| L-Etcyst·D-Nle<br>Quasiracemate A | 1                 | 0.172                                 | 0.067                 |
|                                   | 2                 | 0.654                                 | 1.7635                |
|                                   | 3                 | 1.08                                  | 3.0163                |
|                                   | 4                 | 1.29                                  | 3.2735                |
| Quasiracemate B                   | 1                 | 0.0649                                | 0.3137                |
|                                   | 2                 | 0.718                                 | 1.2735                |
|                                   | 3                 | 0.915                                 | 3.7358                |
|                                   | 4                 | 1.03                                  | 6.2681                |

| Compound                          | Molecular section | $\chi_{\text{RMS}}$<br>L-Etcyst·D-Met | $C_i$<br>L-Etcyst·Met |
|-----------------------------------|-------------------|---------------------------------------|-----------------------|
| L-Etcyst·D-Met<br>Quasiracemate A | 1                 | 0.0282                                | 0.0222                |
|                                   | 2                 | 0.114                                 | 0.0429                |
|                                   | 3                 | 0.110                                 | 0.0315                |
|                                   | 4                 | 0.184                                 | 0.0341                |
| Quasiracemate B                   | 1                 | 0.0444                                | 0.0256                |
|                                   | 2                 | 0.117                                 | 0.0507                |
|                                   | 3                 | 0.110                                 | 0.0444                |
|                                   | 4                 | 0.161                                 | 0.0657                |
| Quasiracemate C                   | 1                 | 0.0862                                | 0.0194                |
|                                   | 2                 | 0.183                                 | 0.0955                |
|                                   | 3                 | 0.6                                   | 0.6396                |
|                                   | 4                 | 0.578                                 | 0.4927                |

#### S4. Cambridge Crystallographic Database (CSD) Searches

A search for methyl cysteinium, ethyl cysteinium, and methioninium cations in the *CCDC-Cambridge Structural Database* (CSD, version 5.42, update 2) produced 15 hits with 19 fragments. The CSD refcodes are provided below.

##### CSD Refcode (number of fragments)

BANPUC (1)  
CONZIO01 (1)  
FAPMAL (1)  
FAPMEP (1)  
FONJAU (1)  
LUDHEX (2)  
METHCL01 (1)  
MOCXUX (1)  
REMSUX (2)  
REMSUX01 (1)  
VICZEN (2)  
WOYVIP (1)  
XAZNAO (1)  
YIGMEI (1)  
YUDDIM (1)

A CSD search (version 5.42, update 2) for the methionyl, methyl cysteinyl, ethyl cysteinyl, and norleucinyl fragments retrieved 292, 35, 12, and 69 entries, respectively. When necessary, the stereochemistry of the retrieved molecular fragments was inverted to the L isomer [ *S* stereochemical configuration for (methionyl and norleucinyl or the *R* isomer for methyl and ethyl cysteine)]. The dihedral angles were converted to values between 0 and 360 °.

| CSD Structure Code | Fragment | $\phi_1$ (°) | $\phi_2$ (°) | $\phi_3$ (°) |
|--------------------|----------|--------------|--------------|--------------|
| <b>Methionyl</b>   |          |              |              |              |
| 2051773            | 1        | 186.335      | 180.791      | 185.081      |
| 2017246            | 1        | 299.277      | 186.61       | 73.282       |
| 2017250            | 1        | 168.846      | 308.436      | 306.316      |
| 2017252            | 1        | 188.925      | 180.778      | 189.402      |
| 2017252            | 2        | 188.543      | 181.983      | 191.315      |
| 2017252            | 3        | 185.385      | 181.019      | 185.18       |
| 2017257            | 1        | 75.031       | 47.367       | 63.419       |
| 2017258            | 1        | 155.851      | 184.293      | 273.885      |
| 2017260            | 1        | 163.492      | 304.371      | 304.221      |
| ACMETM             | 1        | 175.358      | 177.456      | 181.389      |
| ACMTDE             | 1        | 62.125       | 176.033      | 285.479      |
| ALAMET01           | 1        | 306.45       | 178.036      | 188.156      |

|          |   |         |         |         |
|----------|---|---------|---------|---------|
| ALAMET10 | 1 | 303.765 | 175.001 | 186.229 |
| ALAMET11 | 1 | 306.421 | 178.044 | 188.241 |
| ANUPOQ   | 1 | 68.698  | 168.468 | 178.225 |
| ANUPOQ   | 2 | 69.317  | 195.984 | 300.025 |
| ANUPOQ   | 3 | 72.334  | 69.062  | 72.748  |
| ANUPOQ   | 4 | 312.977 | 176.442 | 289.669 |
| ANUPOQ01 | 1 | 304.546 | 180.392 | 284.734 |
| AVIKIA   | 1 | 148.354 | 68.174  | 77.359  |
| BANPUC   | 1 | 304.595 | 179.42  | 289.811 |
| BCMEGL   | 1 | 165.576 | 175.295 | 174.866 |
| BERNIV   | 1 | 81.97   | 183.924 | 296.331 |
| BERQIY   | 1 | 70.951  | 187.374 | 296.15  |
| BIDLOQ   | 1 | 183.946 | 301.006 | 268.341 |
| BIDLOQ   | 2 | 167.529 | 291.71  | 89.166  |
| BOXFUS   | 1 | 183.091 | 177.867 | 163.203 |
| BUYXEY10 | 1 | 179.692 | 175.94  | 71.674  |
| CAQTOD   | 1 | 68.717  | 183.993 | 290.751 |
| CAQTOD   | 2 | 69.714  | 181.606 | 290.254 |
| CAWKIU   | 1 | 308.495 | 189.826 | 77.745  |
| CONZIO01 | 1 | 182.575 | 193.176 | 75.513  |
| DACXUA   | 1 | 178.031 | 287.954 | 160.111 |
| DACXUA10 | 1 | 178.004 | 287.976 | 160.12  |
| DADGUK   | 1 | 172.877 | 300.901 | 300.64  |
| DADNEB   | 1 | 180.209 | 179.036 | 292.019 |
| DADNEB   | 2 | 175.363 | 169.615 | 282.562 |
| DAXLEU   | 1 | 60.697  | 177.833 | 88.897  |
| DAXLIY   | 1 | 174.116 | 186.031 | 327.608 |
| DAXLIY   | 2 | 178.107 | 175.978 | 330.378 |
| DAXLOE   | 1 | 181.628 | 195.04  | 299.759 |
| DEHFAA   | 1 | 170.399 | 276.567 | 87.348  |
| DEHFAA   | 2 | 170.452 | 290.252 | 101.85  |
| DEHFAA   | 3 | 170.731 | 182.181 | 293.392 |
| DEHFAA   | 4 | 172.098 | 175.053 | 284.669 |
| DENNUF   | 1 | 62.301  | 181.353 | 288.276 |
| DEQJOY   | 1 | 304.438 | 289.991 | 295.598 |
| DIWREH   | 1 | 167.644 | 179.441 | 70.404  |
| DIZHAV   | 1 | 167.665 | 287.215 | 275.983 |
| DLMETA05 | 1 | 186.435 | 180.764 | 184.985 |
| DLMETA07 | 1 | 181.988 | 176.652 | 69.339  |
| DLMETA08 | 1 | 186.454 | 180.767 | 184.982 |
| DLMETA09 | 1 | 184.977 | 180.84  | 185.454 |
| DLMETA10 | 1 | 179.302 | 175.814 | 74.832  |
| DLMETA11 | 1 | 179.343 | 176.43  | 75.837  |



|          |   |         |         |         |
|----------|---|---------|---------|---------|
| DUMCET   | 1 | 58.279  | 177.036 | 289.877 |
| DUVSAR   | 1 | 174.932 | 175.061 | 172.618 |
| EBESEM   | 1 | 174.467 | 173.862 | 62.351  |
| EBESEM   | 2 | 175.493 | 173.48  | 62.85   |
| EGUVOU   | 1 | 172.702 | 183.392 | 281.027 |
| EMIPAR   | 1 | 303.303 | 152.825 | 178.663 |
| EMIPAR   | 2 | 164.817 | 71.808  | 182.682 |
| EMIREX   | 1 | 175.104 | 161.338 | 282.539 |
| EMIREX   | 2 | 191.537 | 138.798 | 271.2   |
| EROGY    | 1 | 304.071 | 182.353 | 100.925 |
| ETUTES   | 1 | 55.319  | 174.282 | 121.271 |
| ETUTES   | 2 | 55.484  | 172.171 | 95.208  |
| ETUTES   | 3 | 57.144  | 169.106 | 80.147  |
| ETUTES   | 4 | 58.304  | 171.367 | 76.057  |
| EVIPII   | 1 | 172.642 | 295.72  | 290.644 |
| EYIKEC   | 1 | 174.39  | 186.553 | 300.581 |
| FABPAB   | 1 | 176.239 | 204.549 | 117.568 |
| FABPAB01 | 1 | 159.695 | 172.882 | 74.587  |
| FABPIJ   | 1 | 165.114 | 199.758 | 189.179 |
| FABPOP   | 1 | 159.088 | 177.347 | 73.311  |
| FAPMAL   | 1 | 78.34   | 182.172 | 284.602 |
| FAPMEP   | 1 | 296.222 | 178.463 | 157.362 |
| FEMFOS   | 1 | 291.719 | 177.744 | 281.684 |
| FEYHIA   | 1 | 308.846 | 173.548 | 71.55   |
| FEYHIA   | 2 | 304.134 | 178.014 | 70.161  |
| FITLID   | 1 | 185.753 | 178.076 | 79.108  |
| FIYMUX   | 1 | 139.27  | 304.705 | 296.988 |
| FIYMUX   | 2 | 286.371 | 174.048 | 297.472 |
| FIYMUX   | 3 | 167.118 | 179.522 | 71.34   |
| FOCGOU   | 1 | 295.076 | 180.127 | 169.704 |
| FOCGOU   | 2 | 164.505 | 290.504 | 288.381 |
| FOCGOU   | 3 | 170.561 | 292.432 | 172.814 |
| FOCGOU   | 4 | 176.987 | 181.82  | 185.173 |
| FOKNIC   | 1 | 307.352 | 175.663 | 286.59  |
| FONJAU   | 1 | 306.567 | 177.821 | 174.933 |
| GADBEV   | 1 | 305.47  | 179.47  | 71.835  |
| GADBEV   | 2 | 301.48  | 177.543 | 72.256  |
| GAKZIC   | 1 | 290.914 | 196.892 | 289.964 |
| GAKZIC   | 2 | 176.034 | 180.64  | 291.033 |
| GASTRN10 | 1 | 174.972 | 195.516 | 194.365 |
| GASTRN10 | 2 | 179.214 | 178.092 | 81.064  |
| GEQMEW   | 1 | 172.393 | 296.485 | 281.525 |
| GIMDOW   | 1 | 88.822  | 70.766  | 164.923 |

|          |   |         |         |         |
|----------|---|---------|---------|---------|
| GIMFAK   | 1 | 169.87  | 295.45  | 174.99  |
| GIMFAK   | 2 | 173.671 | 170.92  | 56.902  |
| GIPHUJ   | 1 | 165.326 | 198.659 | 298.104 |
| GOLVOS   | 1 | 187.596 | 180.577 | 189.223 |
| GUKNEF   | 1 | 71.4    | 179.641 | 282.094 |
| GUMXIX   | 1 | 170.412 | 186.868 | 183.879 |
| GUMXIX   | 2 | 65.588  | 168.329 | 283.828 |
| HAFKUU   | 1 | 65.497  | 183.765 | 87.591  |
| HEYRAH   | 1 | 163.021 | 182.13  | 63.638  |
| HEZCOE   | 1 | 190.707 | 189.328 | 311.846 |
| HUCYUA   | 1 | 173.92  | 174.667 | 69.903  |
| HUKQEL   | 1 | 57.565  | 176.189 | 176.629 |
| HURXUP   | 1 | 191.029 | 64.352  | 59.722  |
| HUSJEK   | 1 | 165.432 | 297.273 | 293.31  |
| HUSJEK   | 2 | 170.521 | 177.962 | 66.14   |
| IBUDUF   | 1 | 294.32  | 165.936 | 276.253 |
| IBUDUF   | 2 | 301.311 | 177.55  | 65.234  |
| IDIHEI   | 1 | 165.366 | 152.43  | 282.511 |
| IDIHEI   | 2 | 78.995  | 179.394 | 296.032 |
| IPISAB   | 1 | 177.162 | 194.475 | 181.323 |
| IPISEF   | 1 | 159.518 | 176.17  | 169.709 |
| IPISIJ   | 1 | 158.603 | 176.006 | 170.26  |
| JAQHUH   | 1 | 169.911 | 185.354 | 63.73   |
| JAQJAP   | 1 | 169.283 | 181.808 | 58.59   |
| JAQJET   | 1 | 63.441  | 64.672  | 76.026  |
| JAQJIX   | 1 | 60.919  | 65.393  | 76.061  |
| JAQJIX01 | 1 | 64.33   | 63.318  | 80.895  |
| JAQJUJ   | 1 | 59.53   | 69.362  | 81.387  |
| JUKMIL   | 1 | 160.748 | 174.549 | 289.572 |
| KAFBUP   | 1 | 293.898 | 180.238 | 172.213 |
| KAFBUP   | 2 | 164.069 | 290.636 | 289.299 |
| KAFBUP   | 3 | 171.506 | 292.599 | 172.035 |
| KAFBUP   | 4 | 178.263 | 183.081 | 184.548 |
| LARBEO   | 1 | 192.607 | 186.458 | 197.155 |
| LARBIS   | 1 | 190.398 | 184.866 | 195.929 |
| LEQFIZ   | 1 | 161.886 | 174.007 | 282.36  |
| LEQFIZ   | 2 | 167.746 | 178.82  | 293.179 |
| LEQFIZ   | 3 | 174.879 | 177.714 | 296.295 |
| LIMZIT   | 1 | 296.829 | 169.666 | 60.349  |
| LIMZIT   | 2 | 62.649  | 73.474  | 62.098  |
| LMETON02 | 1 | 71.827  | 171.599 | 181.473 |
| LMETON02 | 2 | 74.103  | 71.521  | 72.374  |
| LMETON11 | 1 | 71.704  | 171.878 | 181.637 |

|          |   |         |         |         |
|----------|---|---------|---------|---------|
| LMETON11 | 2 | 74.096  | 71.706  | 72.242  |
| LMETON12 | 1 | 74.895  | 72.557  | 72.723  |
| LMETON12 | 2 | 76.687  | 172.718 | 182.465 |
| LMETON13 | 1 | 75.832  | 73.359  | 76.87   |
| LMETON13 | 2 | 82.599  | 167.075 | 164.981 |
| LMETON14 | 1 | 179.277 | 171.766 | 59.192  |
| LMETON14 | 2 | 78.67   | 173.978 | 181.871 |
| LMETZN   | 1 | 59.377  | 182.721 | 175.988 |
| LMETZN   | 2 | 59.377  | 182.721 | 175.988 |
| LMETZN01 | 1 | 56.839  | 181.758 | 177.094 |
| LOVQUI   | 1 | 158.529 | 297.803 | 297.592 |
| LOVQUI   | 2 | 148.685 | 301.158 | 301.102 |
| LUDHEX   | 1 | 167.079 | 181.694 | 274.27  |
| LUDHEX   | 2 | 173.452 | 181.524 | 175.973 |
| LUHBUL   | 1 | 171.658 | 302.282 | 295.02  |
| LUHBUL   | 2 | 171.987 | 169.417 | 62.537  |
| MAKLIU   | 1 | 172.272 | 298.101 | 294.147 |
| MAKLIU   | 2 | 178.584 | 306.993 | 291.321 |
| MAZYES   | 1 | 175.672 | 186.149 | 281.983 |
| MAZYES   | 2 | 66.372  | 176.302 | 286.243 |
| MEGNAO   | 1 | 177.303 | 182.398 | 71.902  |
| METHCL   | 1 | 299.15  | 181.815 | 68.739  |
| METHCL01 | 1 | 296.138 | 180.267 | 70.145  |
| METMET   | 1 | 74.629  | 191.711 | 178.387 |
| METMET   | 2 | 302.353 | 189.503 | 302.347 |
| MOCXUX   | 1 | 85.661  | 73.845  | 73.464  |
| NEQYIR   | 1 | 172.819 | 181.675 | 286.491 |
| NOHMON   | 1 | 182.489 | 304.791 | 291.257 |
| NOHMON   | 2 | 177.467 | 311.606 | 303.332 |
| NOHMON   | 3 | 174.835 | 295.34  | 169.248 |
| NOHMON   | 4 | 177.872 | 304.834 | 300.087 |
| OBAVUI   | 1 | 170.067 | 191.919 | 181.125 |
| OBAVUI   | 2 | 170.64  | 299.547 | 292.764 |
| OHELOE   | 1 | 71.363  | 179.104 | 277.428 |
| OLOGEB   | 1 | 193.301 | 304.171 | 290.426 |
| OLOGEB   | 2 | 190.914 | 305.611 | 287.201 |
| OLOGEB   | 3 | 308.974 | 184.475 | 154.365 |
| OLOGEB   | 4 | 161.034 | 191.197 | 177.644 |
| OLOGEB   | 5 | 173.795 | 184.134 | 285.345 |
| OLOGEB   | 6 | 178.745 | 178.454 | 283.977 |
| OLOGEB   | 7 | 62.659  | 186.352 | 294.501 |
| POVYOP   | 1 | 183.925 | 173.881 | 78.251  |
| QOYJEU   | 1 | 190.628 | 186.568 | 280.897 |

|          |    |         |         |         |
|----------|----|---------|---------|---------|
| RAVZAQ   | 1  | 303.768 | 166.052 | 288.54  |
| REMSUX   | 1  | 80.205  | 161.506 | 277.449 |
| REMSUX   | 2  | 84.482  | 63.087  | 70.797  |
| REMSUX01 | 1  | 70.914  | 153.197 | 292.479 |
| RIBTAA   | 1  | 165.844 | 286.649 | 282.669 |
| RICKIA   | 1  | 60.053  | 181.945 | 187.388 |
| RIFVAF   | 1  | 164.625 | 276.512 | 168.49  |
| RIFVAF   | 2  | 171.221 | 193.157 | 299.238 |
| RIFVAF   | 3  | 171.57  | 190.56  | 75.411  |
| RIFVAF   | 4  | 174.595 | 188.564 | 294.939 |
| SAFVOM   | 1  | 179.929 | 308.284 | 306.371 |
| SEGYUA   | 1  | 169.134 | 190.35  | 171.92  |
| SEGYUA   | 2  | 173.23  | 183.657 | 177.787 |
| SEGZAH   | 1  | 168.215 | 180.572 | 185.216 |
| SEGZAH   | 2  | 173.515 | 185.592 | 186.517 |
| SEGZAH   | 3  | 175.373 | 181.502 | 161.639 |
| SIKWEO01 | 1  | 163.815 | 300.633 | 290.536 |
| SIKWEO01 | 2  | 307.675 | 195.441 | 182.272 |
| SUSZIP01 | 1  | 177.336 | 303.803 | 288.73  |
| SUSZIP01 | 2  | 158.206 | 168.95  | 63.098  |
| TBLMCU   | 1  | 57.556  | 180.463 | 174.767 |
| TBLMCU   | 2  | 171.019 | 296.391 | 289.253 |
| TIBZUA   | 1  | 155.172 | 162.56  | 78.001  |
| TICKAS   | 1  | 170.315 | 194.899 | 181.017 |
| TOPSID   | 1  | 78.939  | 186.529 | 296.991 |
| TOPSOJ   | 1  | 54.745  | 160.484 | 76.97   |
| TOPSUP   | 1  | 165.206 | 169.186 | 290.121 |
| TOPSUP   | 2  | 173.975 | 187     | 185.129 |
| TOPSUP   | 3  | 175.656 | 200.797 | 84.536  |
| TOPSUP   | 4  | 177.042 | 199.608 | 83.902  |
| TOPSUP   | 5  | 157.885 | 188.871 | 68.15   |
| TOPSUP   | 6  | 158.568 | 167.946 | 71.646  |
| TOPSUP   | 7  | 159.803 | 181.1   | 64.254  |
| TOPSUP   | 8  | 168.835 | 174.369 | 293.935 |
| TOPSUP   | 9  | 149.885 | 181.959 | 63.426  |
| TOPSUP   | 10 | 150.19  | 184.335 | 62.213  |
| TOPSUP   | 11 | 158.737 | 297.568 | 288.984 |
| TOPSUP   | 12 | 171.119 | 186.523 | 182.296 |
| TOPSUP   | 13 | 155.757 | 295.851 | 279.981 |
| TOPSUP   | 14 | 84.978  | 188.33  | 285.997 |
| TOPSUP   | 15 | 166.49  | 169.008 | 292.732 |
| TOPSUP   | 16 | 174.998 | 178.965 | 285.007 |
| TOPSUP   | 17 | 153.012 | 182.347 | 171.193 |

|          |    |         |         |         |
|----------|----|---------|---------|---------|
| TOPSUP   | 18 | 155.766 | 182.686 | 172.842 |
| TOPSUP   | 19 | 163.614 | 173.464 | 77.128  |
| TOPSUP   | 20 | 168.468 | 294.21  | 291.121 |
| UCAJIT   | 1  | 165.047 | 289.458 | 273.045 |
| UJEJEY   | 1  | 161.713 | 280.381 | 280.156 |
| UJEJEY   | 2  | 168.607 | 296.305 | 286.386 |
| ULEWIT   | 1  | 169.999 | 293.886 | 285.646 |
| UMUBIN   | 1  | 158.227 | 302.577 | 293.999 |
| URODIP   | 1  | 184.324 | 174.422 | 67.846  |
| URODIP01 | 1  | 183.754 | 175.001 | 68.475  |
| URODIP02 | 1  | 184.422 | 174.177 | 68.085  |
| URODIP03 | 1  | 184.158 | 174.342 | 67.761  |
| URODIP04 | 1  | 184.044 | 174.521 | 67.652  |
| URODIP05 | 1  | 184.386 | 180.57  | 67.669  |
| URODIP06 | 1  | 72.766  | 181.875 | 296.871 |
| URODIP06 | 2  | 183.971 | 174.785 | 64.301  |
| URODIP07 | 1  | 74.351  | 183.605 | 288.575 |
| UZIPUP   | 1  | 163.818 | 291.21  | 301.835 |
| VALDIX   | 1  | 179.601 | 299.613 | 278.978 |
| VENXOB   | 1  | 63.27   | 182.622 | 290.184 |
| VEPDOK   | 1  | 305.129 | 179.713 | 67.784  |
| VICZEN   | 1  | 176.123 | 181.672 | 282.843 |
| VICZEN   | 2  | 81.657  | 174.743 | 290.843 |
| VOYNUS   | 1  | 170.869 | 198.108 | 72.825  |
| VOYNUS   | 2  | 56.218  | 176.114 | 286.807 |
| VUKHAK   | 1  | 174.612 | 185.199 | 185.543 |
| VUQNAY   | 1  | 187.577 | 180.456 | 189.201 |
| VUQNAY01 | 1  | 186.639 | 180.769 | 188.112 |
| VUQNAY02 | 1  | 181.578 | 180.583 | 196.507 |
| VUQNAY03 | 1  | 177.634 | 174.91  | 183.219 |
| VUQNAY03 | 2  | 188.021 | 175.301 | 60.108  |
| VUQNAY04 | 1  | 191.758 | 195.311 | 152.463 |
| WAHSAA   | 1  | 174.629 | 292.17  | 281.032 |
| WAHSEE   | 1  | 172.621 | 193.83  | 295.025 |
| WEKVAK   | 1  | 164.457 | 183.298 | 288.719 |
| WEKVAK   | 2  | 184.624 | 296.975 | 279.966 |
| WEKVAK   | 3  | 181.383 | 190.056 | 305.223 |
| WEKVAK   | 4  | 68.391  | 60.386  | 69.491  |
| WIFSIQ   | 1  | 173.651 | 314.623 | 291.127 |
| WIFSIQ   | 2  | 173.772 | 182.474 | 70.748  |
| WOYVIP   | 1  | 155.345 | 171.841 | 58.747  |
| WOYVIP   | 2  | 85.161  | 65.581  | 67.024  |
| XABNAQ   | 1  | 166.334 | 172.914 | 273.469 |

|        |   |         |         |         |
|--------|---|---------|---------|---------|
| XAZNAO | 1 | 157.195 | 69.448  | 74.355  |
| XAZNAO | 2 | 98.11   | 172.069 | 317.223 |
| XECLUN | 1 | 163.312 | 299.327 | 301.65  |
| XEZSOK | 1 | 298.931 | 291.486 | 300.968 |
| XEZTIF | 1 | 182.984 | 173.397 | 294.968 |
| XEZTOL | 1 | 176.557 | 178.695 | 296.364 |
| XIJPUB | 1 | 170.158 | 181.036 | 289.753 |
| XIMNIR | 1 | 150.01  | 170.303 | 186.173 |
| XIMNIR | 2 | 179.528 | 294.469 | 193.647 |
| XOVQOR | 1 | 181.685 | 307.468 | 293.539 |
| XOVQOR | 2 | 168.416 | 296.324 | 292.57  |
| YAJFOG | 1 | 174.332 | 295.292 | 180.728 |
| YIGMEI | 1 | 310.246 | 176.29  | 75.054  |
| YIGMEI | 2 | 176.146 | 191.07  | 290.012 |
| YOSKAU | 1 | 173.279 | 171.498 | 75.881  |
| YOSKAU | 2 | 182.822 | 199.445 | 87.293  |
| YOTVAF | 1 | 170.964 | 183.941 | 290.243 |
| YUDDIM | 1 | 307.286 | 179.667 | 285.866 |
| YUNTUY | 1 | 178.733 | 302.914 | 285.978 |
| YUNTUY | 2 | 176.761 | 295.805 | 282.206 |
| ZEHDEV | 1 | 176.269 | 185.028 | 284.699 |
| ZUHNUL | 1 | 172.927 | 183.729 | 182.634 |

**Methyl Cysteinyl**

|         |   |         |         |
|---------|---|---------|---------|
| 2051774 | 1 | 290.771 | 79.278  |
| CICROY  | 1 | 46.581  | 63.388  |
| EBEQUA  | 1 | 288.508 | 189.379 |
| EYOBUP  | 1 | 183.13  | 294.484 |
| EYOCAW  | 1 | 183.203 | 292.718 |
| EYOCEA  | 1 | 175.582 | 287.681 |
| FIYBUK  | 1 | 172.094 | 289.644 |
| KACQIR  | 1 | 187.211 | 295.681 |
| KACQIR  | 2 | 54.785  | 52.882  |
| KACQIR  | 3 | 185.17  | 274.428 |
| KACQIR  | 4 | 165.341 | 272.576 |
| MCYSCD  | 1 | 174.193 | 275.159 |
| MCYSCD  | 2 | 167.774 | 292.825 |
| MCYSZN  | 1 | 173.8   | 284.987 |
| MCYSZN  | 2 | 169.842 | 284.364 |
| MCYSZN  | 3 | 173.8   | 284.987 |
| NIDXIJ  | 1 | 183.06  | 303.836 |
| NIDXIJ  | 2 | 321.833 | 293.428 |

|        |   |         |         |
|--------|---|---------|---------|
| NIDXIJ | 3 | 301.862 | 88.346  |
| NIDXIJ | 4 | 164.292 | 287.638 |
| NOHMUT | 1 | 167.952 | 265.461 |
| NOHMUT | 2 | 169.777 | 275.189 |
| NOHMUT | 3 | 178.376 | 301.923 |
| NOHMUT | 4 | 178.836 | 287.756 |
| NOHMUT | 5 | 161.646 | 261.697 |
| NOHMUT | 6 | 174.222 | 287.467 |
| NOHMUT | 7 | 65.165  | 77.724  |
| NOHMUT | 8 | 67.297  | 79.961  |
| TIJZAN | 1 | 184.332 | 291.178 |
| WEXYII | 1 | 290.102 | 85.223  |
| WEXYII | 2 | 284.398 | 91.534  |
| WEXYOO | 1 | 180.807 | 289.076 |
| WEXYOO | 2 | 165.854 | 81.962  |
| WUTPIM | 1 | 161.75  | 285.618 |
| WUTPOS | 1 | 307.567 | 279.167 |

**Ethyl CysteinyI**

|         |   |         |         |         |
|---------|---|---------|---------|---------|
| 2054514 | 1 | 292.022 | 86.448  | 58.088  |
| 2051775 | 1 | 297.675 | 99.959  | 157.049 |
| 2051776 | 1 | 287.625 | 80.73   | 63.517  |
| 2051776 | 2 | 287.054 | 80.276  | 172.691 |
| 2051777 | 1 | 168.708 | 90.329  | 161.38  |
| 2017246 | 1 | 295.929 | 91.476  | 152.808 |
| 2017248 | 1 | 292.222 | 82.468  | 58.097  |
| 2017251 | 1 | 169.278 | 90.1    | 161.689 |
| 2017252 | 1 | 182.586 | 179.257 | 188.65  |
| 2017252 | 2 | 182.079 | 177.989 | 189.809 |
| 2017252 | 3 | 173.245 | 89.586  | 158.597 |
| FAXLUL  | 1 | 177.685 | 100.472 | 181.134 |

**NorleucinyI**

|          |   |          |          |          |
|----------|---|----------|----------|----------|
| 2105696  | 1 | 179.470  | 178.050  | -172.450 |
| 2017260  | 1 | -172.300 | 168.280  | 66.250   |
| 2051775  | 1 | 59.140   | 174.490  | -66.220  |
| KUZNIF   | 1 | 172.526  | 175.849  | -175.186 |
| NAJDAH   | 1 | -47.842  | -177.528 | -176.010 |
| NAJDUB   | 1 | 45.810   | 167.048  | 173.854  |
| NAJFAJ   | 1 | -45.281  | -169.490 | -173.800 |
| CITXEI10 | 1 | -152.845 | 174.813  | 66.947   |
| CITXEI10 | 2 | -162.743 | -170.800 | 77.827   |

|          |   |          |          |          |
|----------|---|----------|----------|----------|
| DLNLIT   | 1 | -175.614 | 178.773  | 70.483   |
| DLNLUA01 | 1 | 174.068  | 177.760  | 174.296  |
| DLNLUA02 | 1 | -172.283 | -177.903 | -174.639 |
| DLNLUA03 | 1 | 176.228  | 178.393  | 175.281  |
| DLNLUA04 | 1 | -172.669 | -178.050 | -174.641 |
| DLNLUA05 | 1 | -67.920  | -175.828 | 167.858  |
| DLNLUA06 | 1 | -172.648 | -177.949 | -174.504 |
| FITLEZ   | 1 | -73.196  | 175.499  | 59.905   |
| FITLEZ   | 2 | 175.791  | 172.526  | 172.609  |
| GOLVIM   | 1 | 171.065  | 175.929  | 174.034  |
| GOLVIM01 | 1 | 170.331  | 175.481  | 174.504  |
| GOLVIM02 | 1 | 171.413  | 175.771  | 174.093  |
| GOLVIM03 | 1 | 172.551  | 175.701  | 172.035  |
| GOLVIM04 | 1 | 173.151  | 175.543  | 170.901  |
| GOLVIM04 | 2 | 175.761  | -177.572 | 179.613  |
| GOLVIM05 | 1 | 177.649  | 179.619  | 173.676  |
| GOLVOS   | 1 | 172.429  | 177.031  | 174.302  |
| GOLVUY   | 1 | -179.865 | 176.989  | -62.138  |
| GOLWAF   | 1 | 179.297  | 173.070  | -65.466  |
| GOLWEJ   | 1 | -73.141  | -172.158 | 176.028  |
| LNLEUC11 | 1 | 70.172   | 171.340  | -176.377 |
| LNLEUC11 | 2 | 70.602   | 171.803  | -177.353 |
| LNLEUC11 | 3 | 71.554   | 72.263   | 175.259  |
| LNLEUC11 | 4 | 72.665   | 171.907  | -177.408 |
| LNLEUC11 | 5 | 73.307   | 173.195  | -176.202 |
| LNLEUC11 | 6 | 74.972   | 70.785   | 174.935  |
| LNLEUC12 | 1 | 71.390   | 170.492  | -176.867 |
| LNLEUC13 | 1 | 70.304   | 175.880  | -173.478 |
| LNLEUC14 | 1 | 67.977   | 173.908  | -174.718 |
| LNLEUC15 | 1 | 63.733   | 178.770  | 46.204   |
| MITDUR   | 1 | 55.270   | -159.080 | -60.916  |
| NAXNOS   | 1 | -176.336 | -59.109  | -58.719  |
| QIHSEI   | 1 | -179.788 | 171.493  | -170.867 |
| QUBVOA   | 1 | 176.130  | -60.779  | -173.831 |
| TOWDAN   | 1 | 44.821   | 178.627  | 169.798  |
| TOWDAN   | 2 | 55.788   | -169.141 | 174.293  |
| UHEPUS   | 1 | -179.475 | 178.092  | -175.887 |
| UHEPUS   | 2 | -62.895  | -148.766 | -179.388 |
| URODOV   | 1 | -74.267  | -171.803 | 178.031  |
| VOXHUL   | 1 | 170.247  | -176.372 | -170.853 |
| VOXHUL01 | 1 | 170.951  | -178.708 | -175.590 |
| VUQNAY   | 1 | -172.527 | -177.152 | -174.266 |
| VUQNAY01 | 1 | -177.413 | -176.123 | -174.185 |
| VUQNAY02 | 1 | -175.750 | 175.218  | 149.880  |
| VUQNAY03 | 1 | 175.506  | 179.350  | 53.033   |



|          |   |          |          |          |
|----------|---|----------|----------|----------|
| VUQNAY03 | 2 | 177.724  | 178.851  | 58.294   |
| VUQNAY04 | 1 | 179.290  | 173.267  | 163.598  |
| YAPJEG   | 1 | -62.957  | 177.594  | -178.455 |
| YAPJEG   | 2 | 174.209  | -78.094  | -174.067 |
| ZUHPAT   | 1 | 172.169  | 177.128  | 178.697  |
| IBADUO   | 1 | -178.245 | -176.226 | -172.406 |
| IBAFAW   | 1 | 163.314  | -171.574 | 178.250  |
| IBAFAW   | 2 | 163.603  | -177.945 | 168.702  |
| IBAFAW   | 3 | 164.040  | 174.677  | 172.117  |
| IBAFAW   | 4 | 164.122  | -60.055  | -160.907 |
| IBAFAW   | 5 | 172.585  | 169.437  | 63.928   |
| IBAFEA   | 1 | -177.320 | -58.531  | -57.645  |
| IBAFEA   | 2 | -177.384 | -58.484  | -61.655  |
| IBAFEA   | 3 | -178.909 | -57.714  | -59.551  |
| IBAFUQ   | 1 | 166.609  | -80.941  | 177.527  |
| IBAFUQ   | 2 | 172.285  | 171.240  | 175.108  |
| IBAFUQ   | 3 | 177.426  | 177.218  | 178.025  |
| IBAFUQ   | 4 | 60.103   | 65.648   | 172.699  |
